# Supplementary material
Source: PubMed Central journal article supplement (PMC2782040)
Supplement: supp_M109.023887_Suppl.pdf [file supp_M109.023887_Suppl.pdf]

# SUPPLEMENTAL INFORMATION

## UNUSUAL WATER-MEDIATED ANTIGENIC RECOGNITION OF THE PRO-INFLAMMATORY CYTOKINE INTERLEUKIN-18

Maria A. Argiriadi<sup>1,2</sup>, Tao Xiang<sup>1,2</sup>, Chengbin Wu<sup>3</sup>, Tariq Ghayur<sup>3</sup>,  
and David W. Borhani<sup>1,2§</sup>

From Department of Biochemistry<sup>1</sup>, Chemistry<sup>2</sup>, and Biologics<sup>3</sup>

Abbott Bioresearch Center, 100 Research Drive, Worcester, MA 01605

§ Present Address: D. E. Shaw Research, 120 West Forty-Fifth Street, 39th Floor, New York, NY 10036

**Address correspondence to:** Maria A. Argiriadi, Abbott Bioresearch Center, 100 Research Drive, Worcester, MA 01605. Tel: 508-849-2643, Fax: 508-754-7784, Email: [maria.argiriadi@abbott.com](mailto:maria.argiriadi@abbott.com)

### Cavity Analysis

We sought to address whether the water-filled cavity observed in the IL-18/125-2H Fab complex crystal structure was unusual, and if so, how unusual. We thus analyzed all antibody/protein complexes present in the Protein Data Bank (<http://www.rcsb.org/pdb>) as of mid-January, 2009.

Our search strategy was necessarily tripartite, because current RCSB structural annotations do not allow retrieval of *all* antibody structures with confidence by using a simple search strategy. We considered as “antibody” any of: intact antibodies; antibody Fab, Fab', F(ab)<sub>2</sub>, and F<sub>v</sub> (including scF<sub>v</sub>) fragments; camelid V<sub>HH</sub> domains; and shark antigen-binding domains. When we refer to “antibody” below, we mean this expanded set. We excluded from analysis other immunoglobulin(-like) domain-containing proteins such as antibody F<sub>C</sub> domains, T cell receptors, major histocompatibility complexes, and other (generally extracellular) proteins (although many such proteins were inadvertently “caught” by our search “nets”).

Query A was based on the antibody light chain variable region SCOP classification. We required at least two entities to be present in order to exclude, for example, unliganded scF<sub>v</sub> structures; this approach did allow, however, many unliganded Fab structures to be included. Use of three entities would have undesirably excluded scF<sub>v</sub> (binary) complexes. The search was also restricted to x-ray structures:

#### RCSB QUERY A

```
Experimental Method Search : Experimental Method=X-RAY and  
ScopTree Search for V set domains (antibody variable domain-  
like) and Number of Entities Search : Min Number of Entities=2
```

Query B searched for any of a variety of antibody-like terms present in the *titles* of the PDB entries. Due to limitations on the implementation of Boolean searches at the RCSB, experimental method and number of entities could not be restricted:

**RCSB QUERY B**

```

StructTitleQuery: struct.title.comparator=contains
struct.title.value=antibody or StructTitleQuery:
struct.title.comparator=contains struct.title.value=Fab or
StructTitleQuery: struct.title.comparator=contains
struct.title.value=camelid or StructTitleQuery:
struct.title.comparator=contains struct.title.value=scFv or
StructTitleQuery: struct.title.comparator=contains
struct.title.value=FV or StructTitleQuery:
struct.title.comparator=contains
struct.title.value=immunoglobulin or StructTitleQuery:
struct.title.comparator=contains struct.title.value=IgG or
StructTitleQuery: struct.title.comparator=contains
struct.title.value=IgM

```

Similarly, Query C searched the PDB entry *structural description* with an expanded set of keywords:

**RCSB QUERY C**

```

StructDescQuery: entity.pdbx_description.comparator=contains
entity.pdbx_description.value=antibody or StructDescQuery:
entity.pdbx_description.comparator=contains
entity.pdbx_description.value=antibodies or StructDescQuery:
entity.pdbx_description.comparator=contains
entity.pdbx_description.value=Fab or StructDescQuery:
entity.pdbx_description.comparator=contains
entity.pdbx_description.value=camelid or StructDescQuery:
entity.pdbx_description.comparator=contains
entity.pdbx_description.value=scFv or StructDescQuery:
entity.pdbx_description.comparator=contains
entity.pdbx_description.value=Fv or StructDescQuery:
entity.pdbx_description.comparator=contains
entity.pdbx_description.value=immunoglobulin or
StructDescQuery: entity.pdbx_description.comparator=contains
entity.pdbx_description.value=IgG or StructDescQuery:
entity.pdbx_description.comparator=contains
entity.pdbx_description.value=IgM or StructDescQuery:
entity.pdbx_description.comparator=contains
entity.pdbx_description.value=IgE or StructDescQuery:
entity.pdbx_description.comparator=contains
entity.pdbx_description.value=IgA

```

Search results were exported to Excel spreadsheet format and combined, after sorting by PDB ID, to eliminate duplicates. A record was retained of which query(ies) identified each entry. Next, using both the title of the entry and, when (often) necessary, examining the PDB entry and/or the structure itself (using PyMOL), the ~2,500 hits were classified according to the following scheme:

### Classification Scheme

**Y = Relevant (i.e. an antibody), PROTEIN complex**

N = Relevant, NOT complex

H = Complex, hapten or saccharide

P = Complex, peptide

D = Complex, DNA or RNA

X = Irrelevant (e.g., Fc, TCR, other Ig-fold proteins, or just random entries caught by the net (like FABx proteins, SIGMa factor, trIGGER factor, LIGAnd, non-complexed antiGEN, etc.).

Of the 1,003 *bona fide* antibody structures thus identified, we restricted our attention to antibody/protein complexes, and excluded complexes between antibodies and haptens (or transition state analogues or inhibitors or substrates, i.e. all catalytic antibody complexes), (oligo)saccharides, DNA, RNA, and peptides. Arguably, we could have included antibody/peptide complexes, but visual analysis of a random sampling of these suggested that their binding sites typically consist of an interface much more restricted compared to antibody/protein complexes.

Analysis of pockets and cavities (“pockets” are open to bulk solvent, whereas “cavities” are completely buried) present in the 316 antibody/protein complex structures made use of the CASTp (1) (<http://sts-fw.bioengr.uic.edu/castp/index.php>) and GPSS (2) (<http://gpss.mcsg.anl.gov>) web servers. Water molecules were ignored in all surface and cavity *calculations*; results were visualized with PyMOL (DeLano, W.L. The PyMOL Molecular Graphics System (2002) DeLano Scientific, San Carlos, CA, USA. <http://www.pymol.org>), and water molecules present in and around cavities were examined. Cavity volume was defined as the interior volume of the molecular surface of the cavity, i.e. number “G” below; the cavity volume observed in the IL-18/125-2H Fab complex is  $\sim 215 \text{ \AA}^3$ . “Relevant” cavities possessed a volume greater than  $100 \text{ \AA}^3$  present at the antibody/protein interface. Finally, notations were made on the CASTp volume results, the number of waters observed in each cavity that was identified, and any other observations relevant to pockets, cavities or waters at the antibody/protein interfaces. A typical CASTp entry is shown below (additional details are available at <http://sts-fw.bioengr.uic.edu/castp/inout.php>):

```
POC: 1bql 73 0 61.152 233.69 17.563 210.94 98.31 62
      A B C D E F G H I
A = PDB ID
B = Cavity/pocket ID
C = Number of mouths (by definition, cavities have no
    "mouths", i.e. C = 0)
D = Solvent-accessible surface area ( $\text{\AA}^2$ ; Richard's surface)
E = Molecular surface area ( $\text{\AA}^2$ ; Connolly's surface)
F = Solvent-accessible cavity volume ( $\text{\AA}^3$ ; Richard's surface)
G = Molecular surface cavity volume ( $\text{\AA}^3$ ; Connolly's surface)
H = Arc length ( $\text{\AA}$ ) (H & I represent irrelevant CASTp
I = Number of corners algorithm information)
```

These classified results are available as an Excel spreadsheet on the *Journal of Biological Chemistry* web site as file PDB\_Antibody\_Cavity\_Search\_MASTER\_LIST.xls. It is sorted by “Complex?” and then “PDB ID”. The “Query” field indicates which query(ies) identified a given entry: a “1” in the hundreds place represents Query A; the tens place, Query B; and the ones place, Query C (e.g., 1bgx, “110”, was identified in Queries A and B, but not Query C). The spreadsheet contains HTML links to both the RCSB entry (column A) and, when available, the PubMed citation (column Z). The CASTp cavity results are summarized in “Cavity Information” (column E). Interfacial cavities  $>100 \text{ \AA}^3$  in volume are summarized in Supplementary **Table S1**.

**Table S1. Large cavities found at antibody/protein complex interfaces.** Only structures possessing cavities with volumes greater than 100 Å<sup>3</sup> at the antibody/protein interface are shown. Following the IL-18/125-2H Fab complex entry, the table is sorted by PDB ID. Volumes >200 Å<sup>3</sup> are in **boldface**. Structures discussed in the main text are shown in **blue boldface**.

| PDB Link             | Query | Description                                                                                                                       | Resol. (Å)  | R <sub>free</sub> (%) | Cavity Volume (Å <sup>3</sup> ) | Water Molecules | Notes                                             | PubMed Link              |
|----------------------|-------|-----------------------------------------------------------------------------------------------------------------------------------|-------------|-----------------------|---------------------------------|-----------------|---------------------------------------------------|--------------------------|
| <a href="#">2vxt</a> | N/A   | <b>IL-18/125-2H Fab Complex</b>                                                                                                   | <b>1.50</b> | <b>19.6</b>           | <b>215</b>                      | <b>10</b>       | <b>This work</b>                                  | <b>N/A</b>               |
| <a href="#">1bql</a> | 111   | Structure of an Anti-HEL Fab Fragment Complexed with Bobwhite Quail Lysozyme                                                      | 2.60        | 29.1                  | <b>211</b>                      | 1               | OPEN to solvent                                   | <a href="#">8880929</a>  |
| <a href="#">1bvk</a> | 110   | Humanized Anti-Lysozyme Fv Complexed with Lysozyme                                                                                | 2.70        | 29.7                  | 150<br>165                      |                 |                                                   | <a href="#">9463398</a>  |
| <a href="#">1egj</a> | 111   | Domain 4 of the Beta Common Chain in Complex with an Antibody                                                                     | 2.80        | 28.8                  | 110                             |                 |                                                   | <a href="#">10753826</a> |
| <a href="#">1ezv</a> | 111   | Structure of the Yeast Cytochrome Bc1 Complex Co-Crystallized with an Antibody Fv-Fragment                                        | 2.30        | 25.4                  | <b>243</b>                      | 2               | Almost not a cavity                               | <a href="#">10873857</a> |
| <a href="#">1fbi</a> | 111   | Crystal Structure of a Cross-Reaction Complex Between Fab F9.13.7 and Guinea-Fowl Lysozyme                                        | 3.00        | 0.0                   | 111<br>178                      |                 |                                                   | <a href="#">7629116</a>  |
| <a href="#">1fdl</a> | 111   | Crystallographic Refinement of the Three-Dimensional Structure of the Fab D1.3-Lysozyme Complex at 2.5-Angstroms Resolution       | 2.50        | 0.0                   | 141                             | 0               |                                                   | <a href="#">1712773</a>  |
| <a href="#">1fe8</a> | 111   | Crystal Structure of the Von Willebrand Factor A3 Domain in Complex with a Fab Fragment of IgG Ru5 That Inhibits Collagen Binding | 2.03        | 26.4                  | 125<br>130<br>142               |                 | 3 mol/AU. Barely a cavity; mostly internal to VWF | <a href="#">11098050</a> |
| <a href="#">1fj1</a> | 111   | Lyme Disease Antigen OspA in Complex with Neutralizing Antibody Fab La-2                                                          | 2.68        | 28.1                  | 125<br>121                      | 3<br>3          |                                                   | <a href="#">11183781</a> |
| <a href="#">1g7h</a> | 111   | Crystal Structure of Hen Egg White Lysozyme (Hel) Complexed with the Mutant Anti-HEL Monoclonal Antibody D1.3(VLW92A)             | 1.85        | 0.0                   | 151                             | 4               |                                                   | <a href="#">11112523</a> |
| <a href="#">1g7i</a> | 111   | Crystal Structure of Hen Egg White Lysozyme (Hel) Complexed with the Mutant Anti-HEL Monoclonal Antibody D1.3 (VLW92F)            | 1.80        | 24.8                  | 139                             | 4               |                                                   | <a href="#">11112523</a> |
| <a href="#">1g7j</a> | 111   | Crystal Structure of Hen Egg White Lysozyme (Hel) Complexed with the Mutant Anti-HEL Monoclonal Antibody D1.3 (VLW92H)            | 1.75        | 22.8                  | 143                             | 4               |                                                   | <a href="#">11112523</a> |
| <a href="#">1g7l</a> | 111   | Crystal Structure of Hen Egg White Lysozyme (Hel) Complexed with the Mutant Anti-HEL Monoclonal Antibody D1.3 (VLW92S)            | 2.00        | 24.0                  | 129                             | 4               |                                                   | <a href="#">11112523</a> |
| <a href="#">1g7m</a> | 111   | Crystal Structure of Hen Egg White Lysozyme (Hel) Complexed with the Mutant Anti-HEL Monoclonal Antibody D1.3 (VLW92V)            | 1.90        | 22.6                  | 145                             | 3               |                                                   | <a href="#">11112523</a> |

| PDB Link             | Query      | Description                                                                                             | Resol. (Å)  | $R_{\text{free}}$ (%) | Cavity Volume (Å <sup>3</sup> )        | Water Molecules      | Notes                                                                                                                                                                                                                                                                   | PubMed Link              |
|----------------------|------------|---------------------------------------------------------------------------------------------------------|-------------|-----------------------|----------------------------------------|----------------------|-------------------------------------------------------------------------------------------------------------------------------------------------------------------------------------------------------------------------------------------------------------------------|--------------------------|
| <a href="#">1gc1</a> | 111        | Hiv-1 Gp120 Core Complexed with Cd4 and a Neutralizing Human Antibody                                   | 2.50        | 30.2                  | 188                                    | 2                    | OPEN to solvent                                                                                                                                                                                                                                                         | <a href="#">9641677</a>  |
| <a href="#">1hez</a> | 110        | Antibody-Antigen Complex                                                                                | 2.70        | 27.8                  | 119                                    | 2                    | This cavity is NOT at the Ab combining site, but rather on side of Fab (kappa light chain, VL), where Protein L binds to Ab. Only one of two Protein L/VL interfaces has this cavity (interfaces are asymmetrical; read paper to determine which is/are physiological). | <a href="#">11587642</a> |
| <a href="#">1i9r</a> | 111        | Structure of CD40L in Complex with the Fab Fragment of Humanized 5c8 Antibody                           | 3.10        | 28.5                  | <b>512</b><br><b>561</b><br><b>553</b> |                      | Quite large, deep almost-cavity at interface, but OPEN to solvent (trimer in AU; these are repetitions of the same pocket)                                                                                                                                              | <a href="#">11525169</a> |
| <a href="#">1jps</a> | 111        | Crystal Structure of Tissue Factor in Complex with Humanized Fab D3h44                                  | 1.85        | 22.4                  | 185                                    | 5                    |                                                                                                                                                                                                                                                                         | <a href="#">11601848</a> |
| <a href="#">1jto</a> | 111        | Degenerate Interfaces in Antigen-Antibody Complexes                                                     | 2.50        | 24.0                  | 103                                    |                      |                                                                                                                                                                                                                                                                         | <a href="#">11676532</a> |
| <a href="#">1kb5</a> | <b>111</b> | <b>Murine T-Cell Receptor Variable Domain/Fab Complex</b>                                               | <b>2.50</b> | <b>0.0</b>            | <b>199</b><br><b>718</b>               | <b>2</b><br><b>7</b> | <b>Larger pocket has 7 waters (8 stated in Mazza G. <i>et al.</i> (1999) <i>J. Mol. Biol.</i> 287:773), at TCR/Fab interface. Association constant <math>K_a \sim 2.4 \times 10^8 \text{ M}^{-1}</math></b>                                                             | <a href="#">9250664</a>  |
| <a href="#">1kb9</a> | 101        | Yeast Cytochrome bc1 Complex                                                                            | 2.30        | 24.9                  | 172                                    | 2                    | Just barely a cavity                                                                                                                                                                                                                                                    | <a href="#">11726495</a> |
| <a href="#">1kip</a> | 111        | Fv Mutant Y(B 32)A (VH Domain) of Mouse Monoclonal Antibody D1.3 Complexed with Hen Egg White Lysozyme  | 2.10        | 0.0                   | 152                                    | 3                    | Two adjacent large pockets at interface, with waters. Equilibrium binding constant $K_b \sim 7.0 \times 10^7 \text{ M}^{-1}$                                                                                                                                            | <a href="#">8952503</a>  |
| <a href="#">1kiq</a> | 111        | Fv Mutant Y(B 101)F (VH Domain) of Mouse Monoclonal Antibody D1.3 Complexed with Hen Egg White Lysozyme | 1.85        | 0.0                   | 155                                    | 4                    | Two adjacent large pockets at interface, with waters. Equilibrium binding constant $K_b \sim 4.0 \times 10^6 \text{ M}^{-1}$                                                                                                                                            | <a href="#">8952503</a>  |
| <a href="#">1kxq</a> | 111        | Camelid VHH Domain in Complex with Porcine Pancreatic Alpha-Amylase                                     | 1.60        | 21.9                  | 141                                    |                      | Not actually a cavity (but close). This is the "correct", CDR-bound orientation VHH to amylase (which has a large pocket open to solvent).                                                                                                                              | <a href="#">11960990</a> |
| <a href="#">1kxt</a> | 111        | Camelid VHH Domains in Complex with Porcine Pancreatic Alpha-Amylase                                    | 2.00        | 23.6                  | 172                                    |                      | Very similar to 1KXV, with unusual side-on binding of VHH to amylase. "Cavities" OPEN to solvent.                                                                                                                                                                       | <a href="#">11960990</a> |

| PDB Link             | Query | Description                                                                                                                                               | Resol. (Å)  | $R_{\text{free}}$ (%) | Cavity Volume (Å <sup>3</sup> ) | Water Molecules        | Notes                                                                                                                                                                       | PubMed Link              |
|----------------------|-------|-----------------------------------------------------------------------------------------------------------------------------------------------------------|-------------|-----------------------|---------------------------------|------------------------|-----------------------------------------------------------------------------------------------------------------------------------------------------------------------------|--------------------------|
| <a href="#">1kxv</a> | 111   | Camelid VHH Domains in Complex with Porcine Pancreatic Alpha-Amylase                                                                                      | 1.60        | 22.9                  | <b>230</b>                      | 5                      | Unusual side-on binding of VHH to amylase. OPEN to solvent in other complex in AU (which CASTp lists as a "cavity": POC: 1kxv 194 0 72.770 244.21 21.340 229.88 104.71 70). | <a href="#">11960990</a> |
| <a href="#">1kyo</a> | 101   | Yeast Cytochrome bc1 Complex with Bound Substrate Cytochrome c                                                                                            | 2.97        | 26.8                  | <b>231</b><br><b>257</b>        | 0                      | Similar to 1KB9. 2 mol/AU. Smaller pocket is OPEN (not a cavity).                                                                                                           | <a href="#">11880631</a> |
| <a href="#">1lk3</a> | 110   | Engineered Human Interleukin-10 Monomer Complexed to 9d7 Fab Fragment                                                                                     | 1.91        | 24.0                  | 97<br>96                        | 3<br>3                 | Just under 100 Å <sup>3</sup> cutoff                                                                                                                                        | <a href="#">12121653</a> |
| <a href="#">1mel</a> | 111   | Crystal Structure of a Camel Single-Domain VH Antibody Fragment in Complex with Lysozyme                                                                  | 2.50        | 32.3                  | 109<br>116                      | 1<br>0                 | Smaller cavity OPEN to solvent via narrow neck                                                                                                                              | <a href="#">8784355</a>  |
| <a href="#">1nma</a> | 101   | N9 Neuraminidase Complexes with Antibodies NC41 and NC10: Empirical Free-Energy Calculations Capture Specificity Trends Observed with Mutant Binding Data | 3.00        | 0.0                   | 111                             | 0                      | Between VH & neuraminidase                                                                                                                                                  | <a href="#">7517697</a>  |
| <a href="#">1ob1</a> | 111   | Crystal Structure of a Fab Complex with Plasmodium Falciparum Msp1-19                                                                                     | 2.90        | 28.8                  | 95<br>99                        | 0<br>0                 |                                                                                                                                                                             | <a href="#">12729744</a> |
| <a href="#">1p84</a> | 101   | HDBT Inhibited Yeast Cytochrome bc1 Complex                                                                                                               | 2.50        | 25.2                  | 180                             | 1                      | OPEN to solvent                                                                                                                                                             | <a href="#">12782631</a> |
| <a href="#">1qfu</a> | 111   | Influenza Virus Hemagglutinin Complexed with a Neutralizing Antibody                                                                                      | 2.80        | 28.4                  | 168<br>114                      | 0<br>2                 | Larger cavity OPEN to solvent                                                                                                                                               | <a href="#">10360354</a> |
| <a href="#">1rjl</a> | 111   | Structure of the Complex Between OspB-CT and Bactericidal Fab-H6831                                                                                       | 2.60        | 23.5                  | <b>223</b>                      | 5                      |                                                                                                                                                                             | <a href="#">15713683</a> |
| <a href="#">1s78</a> | 101   | Insights Into ErbB Signaling From the Structure of the ErbB2-Pertuzumab Complex                                                                           | 3.25        | 26.8                  | 111<br>106                      | 0<br>0                 |                                                                                                                                                                             | <a href="#">15093539</a> |
| <a href="#">1tzh</a> | 111   | Crystal Structure of the Fab YADS1 Complexed with H-VEGF                                                                                                  | 2.60        | 27.1                  | 114                             | 2                      | OPEN to solvent                                                                                                                                                             | <a href="#">15306681</a> |
| <a href="#">1uac</a> | 110   | Crystal Structure of HYHEL-10 FV Mutant SFSF Complexed with Turkey White Lysozyme                                                                         | 1.70        | 24.8                  | <b>318</b>                      | 3                      | Not actually a cavity; narrow neck to solvent                                                                                                                               | <a href="#">12709438</a> |
| <a href="#">1uj3</a> | 111   | Crystal Structure of a Humanized Fab Fragment of Anti-Tissue-Factor Antibody in Complex with Tissue Factor                                                | 2.10        | 22.7                  | 109                             | ~8                     | Not actually a cavity; rather an intricate series of necks, all OPEN to solvent                                                                                             | <a href="#">14646147</a> |
| <a href="#">1vfb</a> | 111   | <b>Bound Water Molecules and Conformational Stabilization Help Mediate an Antigen-Antibody Association</b>                                                | <b>1.80</b> | <b>0.0</b>            | <b>156</b><br><b>770</b>        | <b>4</b><br><b>~10</b> | <b>Larger pocket OPEN to solvent by two necks, at the interface</b>                                                                                                         | <a href="#">8302837</a>  |
| <a href="#">1w72</a> | 111   | Crystal Structure of HLA-A1:MAGE-A1 in Complex with Fab-HYB3                                                                                              | 2.15        | 24.8                  | 290<br>297                      | 7<br>4                 | These cavities are between the MAGE-A1 peptide and HLA, <b>not</b> the HLA/peptide complex and the Fab. (2 complexes/AU)                                                    | <a href="#">15537658</a> |
| <a href="#">1ygv</a> | 111   | <b>The Crystal Structure of the Antibody Fab HyHEL5 Complex with Lysozyme at 1.7 Å Resolution</b>                                                         | <b>1.70</b> | <b>23.4</b>           | <b>136</b>                      | <b>4</b>               |                                                                                                                                                                             | <a href="#">15858274</a> |

| PDB Link             | Query | Description                                                                                                                                                  | Resol. (Å) | $R_{\text{free}}$ (%) | Cavity Volume (Å <sup>3</sup> ) | Water Molecules | Notes                                                                                                                                                                                                                                                                                                                                                                                                                                                                                                                                                                                                                                                                            | PubMed Link              |
|----------------------|-------|--------------------------------------------------------------------------------------------------------------------------------------------------------------|------------|-----------------------|---------------------------------|-----------------|----------------------------------------------------------------------------------------------------------------------------------------------------------------------------------------------------------------------------------------------------------------------------------------------------------------------------------------------------------------------------------------------------------------------------------------------------------------------------------------------------------------------------------------------------------------------------------------------------------------------------------------------------------------------------------|--------------------------|
| <a href="#">1yy9</a> | 11    | Structure of the Extracellular Domain of the Epidermal Growth Factor Receptor in Complex with the Fab Fragment of Cetuximab/Erbitux/IMC-C225                 | 2.61       | 28.9                  | 101<br><b>238</b>               | 1<br>6          | Larger pocket OPEN to solvent                                                                                                                                                                                                                                                                                                                                                                                                                                                                                                                                                                                                                                                    | <a href="#">15837620</a> |
| <a href="#">1zmy</a> | 1     | cAbBCII-10 VHH Framework with CDR Loops of cAbLys3 Grafted on It and in Complex with Hen Egg White Lysozyme                                                  | 3.00       | 25.4                  | 100                             | 0               |                                                                                                                                                                                                                                                                                                                                                                                                                                                                                                                                                                                                                                                                                  | <a href="#">16095608</a> |
| <a href="#">2aep</a> | 11    | An Epidemiologically Significant Epitope of a 1998 Influenza Virus Neuraminidase Forms a Highly Hydrated Interface in the NA-Antibody Complex.               | 2.10       | 22.4                  | N/A                             | N/A             | No relevant cavities >100 Å <sup>3</sup> Paper mentions 33 buried waters, of which 13 are buried by protein only (i.e., other 20 buried by protein & <i>other</i> waters). Careful examination of this cryogenic structure reveals several invaginations and lots of waters, but no significant cavities. Part of the difference between the reported results and those observed with CASTp/PyMOL may be related to the fact that the Ab seems to bind NA right at a large hydrated crevice in neuraminidase. Binding Kd is ~12 nM. Related entry 2aeq, determined at room temperature (note resol. & $R_{\text{free}}$ increase) has some cavities, but none truly significant. | <a href="#">16384583</a> |
| <a href="#">2aeq</a> | 11    | An Epidemiologically Significant Epitope of a 1998 Influenza Virus Neuraminidase Forms a Highly Hydrated Interface in the NA-Antibody Complex.               | 3.00       | 31.2                  | 106<br>150                      | 0<br>0          | Smaller pocket just barely open to solvent                                                                                                                                                                                                                                                                                                                                                                                                                                                                                                                                                                                                                                       | <a href="#">16384583</a> |
| <a href="#">2cmr</a> | 10    | Crystal Structure of the HIV-1 Neutralizing Antibody D5 Fab Bound to the gp41 Inner-Core Mimetic 5-Helix                                                     | 2.00       | 25.8                  | <b>261</b>                      | 3               | Cavity also includes a glycerol molecule                                                                                                                                                                                                                                                                                                                                                                                                                                                                                                                                                                                                                                         | <a href="#">16862157</a> |
| <a href="#">2dd8</a> | 11    | Crystal Structure of SARS-CoV Spike Receptor-Binding Domain Complexed with Neutralizing Antibody                                                             | 2.30       | 26.1                  | 148                             | 5               | OPEN to solvent via small neck                                                                                                                                                                                                                                                                                                                                                                                                                                                                                                                                                                                                                                                   | <a href="#">16597622</a> |
| <a href="#">2dqf</a> | 110   | Crystal Structure of HyHEL-10 FV Mutant (Y33A, Y53A) Complexed with Hen Egg Lysozyme                                                                         | 2.50       | 26.8                  | 115                             | 1               | OPEN to solvent                                                                                                                                                                                                                                                                                                                                                                                                                                                                                                                                                                                                                                                                  | <a href="#">17166830</a> |
| <a href="#">2dtg</a> | 11    | Insulin Receptor (IR) Ectodomain in Complex with Fab's                                                                                                       | 3.80       | 31.0                  | <b>244</b>                      | 0               |                                                                                                                                                                                                                                                                                                                                                                                                                                                                                                                                                                                                                                                                                  | <a href="#">16957736</a> |
| <a href="#">2ibz</a> | 111   | Yeast Cytochrome bc1 Complex with Stigmatellin                                                                                                               | 2.30       | 25.6                  | 173                             | 2               | Not quite a cavity (but very narrow neck)                                                                                                                                                                                                                                                                                                                                                                                                                                                                                                                                                                                                                                        | <a href="#">17337272</a> |
| <a href="#">2iff</a> | 111   | Structure of an Antibody-Lysozyme Complex: Effect of a Conservative Mutation                                                                                 | 2.65       | 0.0                   | 173                             | 2               |                                                                                                                                                                                                                                                                                                                                                                                                                                                                                                                                                                                                                                                                                  | <a href="#">7531245</a>  |
| <a href="#">2j6e</a> | 11    | Crystal Structure of an Autoimmune Complex Between a Human IgM Rheumatoid Factor and IgG1 Fc Reveals a Novel Fc Epitope and Evidence For Affinity Maturation | 3.00       | 28.8                  | 133<br>125                      | 1               |                                                                                                                                                                                                                                                                                                                                                                                                                                                                                                                                                                                                                                                                                  | <a href="#">17395205</a> |



| PDB Link             | Query | Description                                                                                                                                               | Resol. (Å) | $R_{\text{free}}$ (%) | Cavity Volume (Å <sup>3</sup> )                                                                | Water Molecules                 | Notes                                                                                                                                                                                                 | PubMed Link              |
|----------------------|-------|-----------------------------------------------------------------------------------------------------------------------------------------------------------|------------|-----------------------|------------------------------------------------------------------------------------------------|---------------------------------|-------------------------------------------------------------------------------------------------------------------------------------------------------------------------------------------------------|--------------------------|
| <a href="#">2j88</a> | 111   | Hyaluronidase in Complex with a Monoclonal IgG Fab Fragment                                                                                               | 2.60       | 24.7                  | 134                                                                                            | 2                               | Narrow OPENing to solvent                                                                                                                                                                             | <a href="#">17374540</a> |
| <a href="#">2nyy</a> | 111   | Crystal Structure of Botulinum Neurotoxin Type A Complexed with Monoclonal Antibody CR1                                                                   | 2.61       | 24.6                  | 123<br>100                                                                                     | 0<br>0                          | Smaller pocket OPEN to solvent; adjacent to larger cavity                                                                                                                                             | <a href="#">17173035</a> |
| <a href="#">2nz9</a> | 111   | Crystal Structure of Botulinum Neurotoxin Type A Complexed with Monoclonal Antibody AR2                                                                   | 3.79       | 27.8                  | 131<br>109                                                                                     | 0<br>0                          | Cavities adjacent. to one another                                                                                                                                                                     | <a href="#">17173035</a> |
| <a href="#">2q8a</a> | 11    | Structure of the Malaria Antigen AMA1 in Complex with a Growth-Inhibitory Antibody                                                                        | 2.40       | 24.4                  | <b>461</b>                                                                                     | 9                               | Slightly OPEN to solvent via narrow neck. Affinity of 1F9 antibody is not specified; estimate ~100 μM from Fig. 2A of Coley, AM <i>et al.</i> (2006) <i>Infection &amp; Immunity</i> <b>74</b> :2628. | <a href="#">17907804</a> |
| <a href="#">2q8b</a> | 11    | Structure of the Malaria Antigen AMA1 in Complex with a Growth-Inhibitory Antibody                                                                        | 2.30       | 25.6                  | <b>461</b>                                                                                     | 10                              | Slightly OPEN to solvent via narrow neck                                                                                                                                                              | <a href="#">17907804</a> |
| <a href="#">2gad</a> | 11    | Structure of Tyrosine-Sulfated 412d Antibody Complexed with HIV-1 YU2 gp120 and CD4                                                                       | 3.30       | 26.9                  | 140<br>141                                                                                     | 0<br>0                          | OPEN to solvent                                                                                                                                                                                       | <a href="#">17901336</a> |
| <a href="#">2r0l</a> | 11    | Short Form HGFA with Inhibitory Fab75                                                                                                                     | 2.20       | 24.8                  | 186<br><b>321</b>                                                                              | 3<br>3                          |                                                                                                                                                                                                       | <a href="#">18077410</a> |
| <a href="#">2r69</a> | 10    | Crystal Structure of Fab 1A1D-2 Complexed with E-DIII of Dengue Virus at 3.8 Angstrom Resolution                                                          | 3.80       | 36.3                  | 106                                                                                            | 0                               | Quite OPEN to solvent                                                                                                                                                                                 | <a href="#">18264114</a> |
| <a href="#">2vwe</a> | 11    | Crystal Structure of Vascular Endothelial Growth Factor-B in Complex with a Neutralizing Antibody Fab Fragment                                            | 3.40       | 31.0                  | 115                                                                                            | 0                               | OPEN to solvent                                                                                                                                                                                       | <a href="#">18930733</a> |
| <a href="#">3b2u</a> | 11    | Crystal Structure of Isolated Domain III of the Extracellular Region of the Epidermal Growth Factor Receptor in Complex with the Fab Fragment of IMC-11F8 | 2.58       | 29.1                  | <b>237</b><br><b>277</b><br><b>264</b><br><b>254</b><br><b>254</b><br><b>222</b><br><b>294</b> | 1<br>2<br>1<br>0<br>0<br>1<br>0 | Largest cavity almost OPEN to solvent                                                                                                                                                                 | <a href="#">18275813</a> |
| <a href="#">3bn9</a> | 11    | Crystal Structure of MT-SP1 in Complex with Fab Inhibitor E2                                                                                              | 2.17       | 26.7                  | 138<br>129                                                                                     | 1<br>2                          | Long tunnel (OPEN at both ends) between Fab & protease is filled with water. Tunnel created by long, arching CDR H3. Ab has pM affinity.                                                              | <a href="#">18514224</a> |
| <a href="#">3cvh</a> | 11    | How TCR-Like Antibody Recognizes MHC-Bound Peptide                                                                                                        | 2.90       | 29.6                  | 135<br>114                                                                                     | 0<br>0                          |                                                                                                                                                                                                       | <a href="#">18703505</a> |
| <a href="#">3cx5</a> | 1     | Structure of Complex III with Bound Cytochrome c in Reduced State and Definition of a Minimal Core Interface for Electron Transfer                        | 1.90       | 26.3                  | <b>245</b><br><b>250</b>                                                                       | 3<br>3                          | OPEN to solvent                                                                                                                                                                                       | <a href="#">18390544</a> |



| PDB Link             | Query | Description                                                                                                                       | Resol. (Å) | $R_{\text{free}}$ (%) | Cavity Volume (Å <sup>3</sup> ) | Water Molecules | Notes                                                                    | PubMed Link              |
|----------------------|-------|-----------------------------------------------------------------------------------------------------------------------------------|------------|-----------------------|---------------------------------|-----------------|--------------------------------------------------------------------------|--------------------------|
| <a href="#">3cxh</a> | 1     | Structure of Yeast Complex III with Isoform-2 Cytochrome c Bound and Definition of a Minimal Core Interface for Electron Transfer | 2.50       | 25.6                  | 131<br><b>214</b>               | 0<br>1          | Smaller pocket OPEN to solvent.<br>Larger cavity almost OPEN to solvent. | <a href="#">18390544</a> |
| <a href="#">3eo1</a> | 11    | Structure of the Fab Fragment of GC-1008 in Complex with Transforming Growth Factor-Beta 3                                        | 3.10       | 27.9                  | 131<br>131                      | 0<br>0          |                                                                          | <a href="#">19073914</a> |
| <a href="#">3hfm</a> | 111   | Structure of an Antibody-Antigen Complex. Crystal Structure of the Hy/HEL-10 Fab-Lysozyme Complex                                 | 3.00       | 0.0                   | 121                             | 0               |                                                                          | <a href="#">2762305</a>  |

## Supplemental Figures

(a)

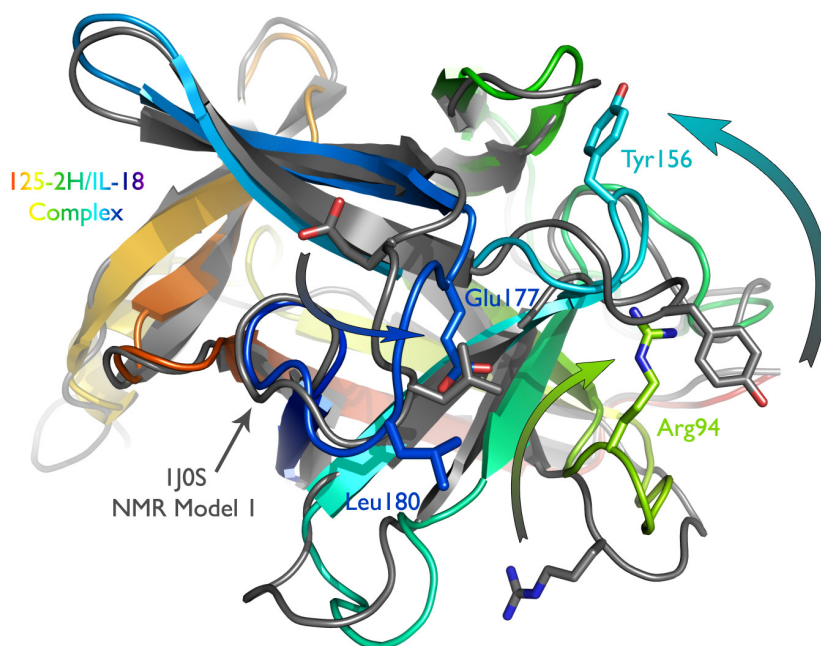

(b)

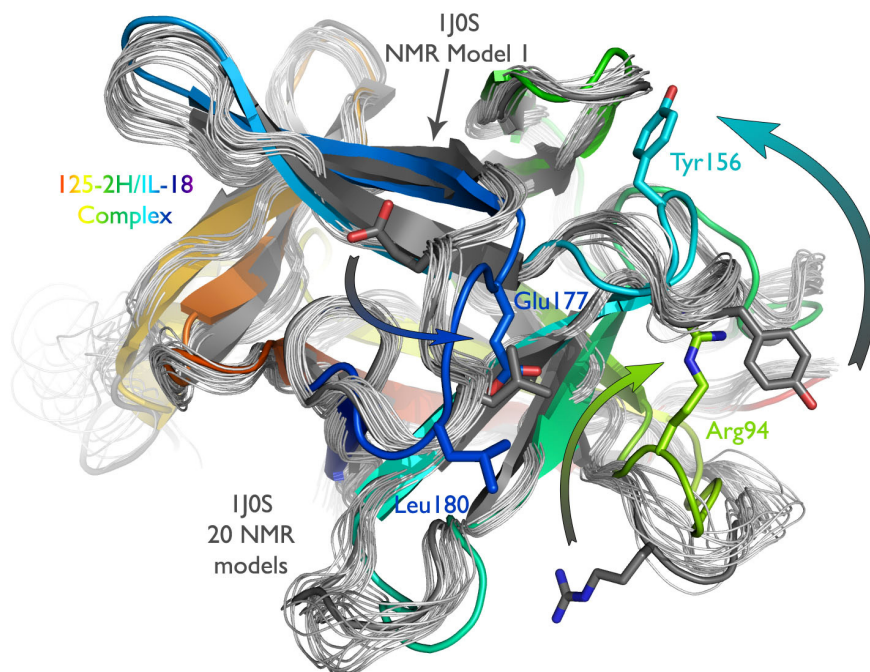

**Figure S1. Free- and 125-2H-bound IL-18 exhibit large conformational differences.** Free- (grey; NMR, PDB entry 1J0S) and 125-2H Fab-bound (rainbow, *N/C*-termini red/blue; x-ray, this work) IL-18 are superimposed. (a) The best NMR model and the x-ray structure are shown as cartoons. (b) All 20 NMR models (tubes; light grey), the best NMR model (cartoon), and the x-ray structure are shown. Arg94, Tyr156, Glu177, and Leu180, and associated surface loops, exhibit significant movement which far exceeds the observed NMR positional variability.

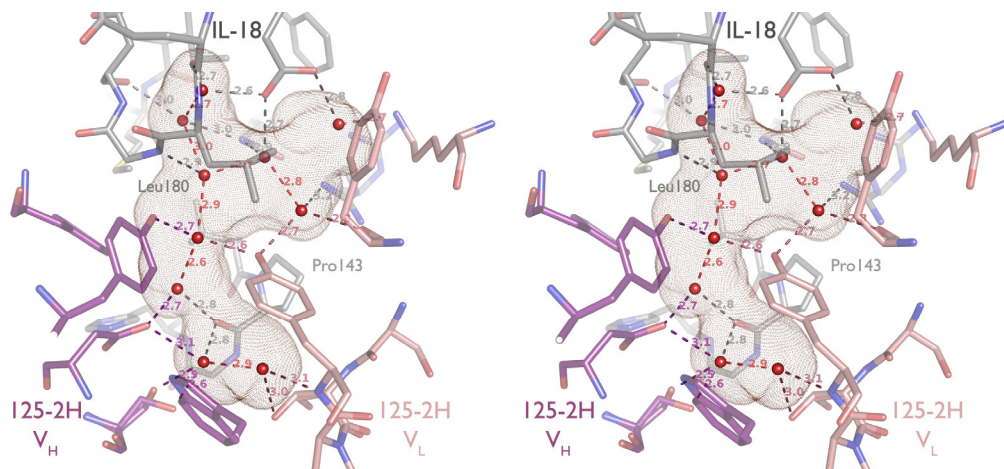

**Figure S2. Ice-like hydrogen bonds fill the buried cavity between IL-18 and 125-2H.** In this relaxed-eye stereoview, IL-18 (grey) and the 125-2H Fab fragment (purple [ $V_H$ ] and pink [ $V_L$ ]) are shown as sticks, the water molecules sequestered between the two proteins are shown as red spheres, and the molecular surface of the buried cavity is shown as a brown dotted surface. All hydrogen bonds ( $< 3.2 \text{ \AA}$ ) between these water molecules and either the proteins or other water molecules are shown as dotted lines; the colors of the lines and associated distances match those of the hydrogen bond partners.

## Acknowledgements

We thank an anonymous Reviewer for prompting us to examine water cavities at antibody/antigen interfaces in detail, Joseph Dundas and Andrew Binkowski for their help with the CASTp and GPSS servers, and Warren DeLano for help with PyMOL scripting.

## References

1. Dundas, J., Ouyang, Z., Tseng, J., Binkowski, A., Turpaz, Y., and Liang, J. (2006) *Nucleic Acids Res* **34**(Web Server issue), W116-118
2. Binkowski, T. A., and Joachimiak, A. (2008) *BMC structural biology* **8**, 45
